# Supplementary material for: Easy Volcanic Aerosol (EVA v1.0): an idealized forcing generator for climate simulations
Source: Copernicus journal article supplement (doi:10.5194/gmd-9-4049-2016), 2016-11-11
Supplement: Supplementary file 1 [file gmd-9-4049-2016-supplement.zip]

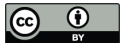

## *Supplement of*

# **Easy Volcanic Aerosol (EVA v1.0): an idealized forcing generator for climate simulations**

**Matthew Toohey et al.**

*Correspondence to:* Matthew Toohey (mtoohey@geomar.de)

- gmd-9-4049-2016-supplement-title-page.pdf
- easy-volcanic-aerosol
  - EVAv1\_parameter\_set\_v1.0.nc
  - Eruption\_list\_GMD\_1960\_2015.nc
  - LICENSE
  - eva\_Mie\_lookeytables.nc
  - eva\_build\_aod\_file.f90
  - eva\_build\_forcing\_files.f90
  - eva\_build\_sulfate\_file.f90
  - eva\_gridfile\_echam\_T63\_ir.nc
  - eva\_gridfile\_echam\_T63\_sw.nc
  - mo\_EVA.f90
  - readme

The copyright of individual parts of the supplement might differ from the CC-BY 3.0 licence.
